# Supplementary material for: EXAFS Characterization of Palladium-on-Gold Catalysts Before and After Glycerol Oxidation
Source: Springer Nature journal article supplement (doi:10.1007/s11244-015-0371-3), 2015-03-11
Supplement: MOESM1 [file 5791756]

**Electronic Supplementary Material for**

EXAFS characterization of palladium-on-gold catalysts before and after glycerol oxidation

Zhun Zhao, Jeffrey T. Miller, Tianpin Wu, Neil M. Schweitzer, and Michael S. Wong *

**Table S1.** Composition of reducing mixture to synthesize 4 nm sized Au NPs.

| Au NPs size (nm) | Volume of salt solution added (mL) | | | H2O (mL) | Total (mL) |
| --- | --- | --- | --- | --- | --- |
| Sodium citratea | Tannic acidb | Potassium carbonatec |
| 4 | 4 | 5 | 5 | 6 | 20 |

a. 1 wt% sodium citrate in H2O.

b. 1 wt% tannic acid in H2O.

c. 25 mM potassium carbonate in H2O.

**Table S2.** Volumes of PdCl42- used to synthesize Pd-on-Au NPs with various Pd surface coverages.

| Pd surface coverage (sc%) | Volume of PdCl42- precursor (mL)a,b |
| --- | --- |
| 0 | 0.00 |
| 10 | 0.46 |
| 30 | 1.36 |
| 50 | 2.27 |
| 60 | 2.73 |
| 80 | 3.64 |
| 100 | 4.55 |
| 150 | 7.42 |

a. Volumes shown are for a 2.49 mM PdCl42- solution added to 100 mL of Au NP sol.

b. All calculations are based on the magic cluster model.

**Table S3.** Calculated Au and Pd metal contents of Pd-on-Au/C catalystsa.

| Pd surface coverage (sc%) | Calculated Au metal content on C (wt%) | Calculated Pd metal content on C (wt%) |
| --- | --- | --- |
| 0 | 1 | 0.000 |
| 10 | 1 | 0.025 |
| 30 | 1 | 0.074 |
| 50 | 1 | 0.123 |
| 60 | 1 | 0.147 |
| 80 | 1 | 0.196 |
| 100 | 1 | 0.245 |
| 150 | 1 | 0.400 |

a. 201 mL Pd-on-Au NP sol were used to synthesize 1 g Pd-on-Au/C catalysts for all Pd surface coverages and all Au core sizes.

**Table S4.** Volumes of Au and Pd-on-Au NP sol used to synthesize 1 g of Pd-on-Au/C samples for XAS analysis and their calculated Au and Pd metal contents.

| Pd surface coverage (sc%) | Volume of Pd-on-Au NPs sol used (mL) | Calculated Au metal content on C (wt%) | Calculated Pd metal content on C (wt%) |
| --- | --- | --- | --- |
| 0 | 201 | 1 | - |
| 60 | 1407 | 6.80 | 1 |
| 150 | 542 | 2.50 | 1 |

**Coordination number calculation for alloyed PdAu NPs**:

CN values for alloyed PdAu NPs can be calculated using metal molar composition and the total Pd and total Au CNs with the following equations:

Pd-Pdalloy CN = total Pd CN × mol% Pd

Pd-Aualloy CN = total Pd CN × mol% Au

Au-Aualloy CN = total Au CN × mol% Au

Au-Pdalloy CN = total Au CN × mol% Pd

**Fig. S1.** Coordination numbers for (a) Au-Au, (b) Au-Pd, (c) Pd-Pd, and (d) Pd-Au absorbing-scattering pairs for the reduced samples of 4 nm Au/C, 60 sc% and 150 sc% Pd-on-Au/C catalysts before and after reaction. "N/A" = no detection of scattering signal or no available number.
